1 Brequinar and Dipyridamole in Combination Exhibits Synergistic Antiviral  
2 Activity Against SARS-CoV-2 *in vitro*: Rationale for a host-acting antiviral  
3 treatment strategy for COVID-19

4 Authors

5 James F. Demarest<sup>a</sup>, Maryline Kienle<sup>a</sup>, RuthMabel Boytz<sup>b</sup>, Mary Ayres<sup>c</sup>, Eun Jung Kim<sup>d</sup>,  
6 Donghoon Chung<sup>d</sup>, Varsha Gandhi<sup>c</sup>, Robert Davey<sup>b</sup>, David B. Sykes<sup>a,e,f,g</sup>, Nadim Shohdy<sup>a</sup>, John  
7 C. Pottage, Jr.<sup>a</sup>, Vikram S. Kumar<sup>a\*</sup>

8 <sup>a</sup> Clear Creek Bio, Cambridge, Massachusetts, USA

9 <sup>b</sup> NEIDL, Boston University, Boston, Massachusetts, USA

10 <sup>c</sup> Department of Experimental Therapeutics, MD Anderson Cancer Center, Houston, Texas, USA

11 <sup>d</sup> University of Louisville, Louisville, Kentucky, USA

12 <sup>e</sup> Center for Regenerative Medicine, Massachusetts General Hospital, Boston, MA.

13 <sup>f</sup> Harvard Stem Cell Institute, Cambridge, MA.

14 <sup>g</sup> Massachusetts General Hospital Cancer Center, Boston, MA.

15 \*Corresponding author

16 **KEYWORDS:** Brequinar, dipyridamole, dihydroorotate dehydrogenase (DHODH), COVID-19,

17 SARS-CoV-2

18 **ABSTRACT**

19 The continued evolution of severe acute respiratory syndrome coronavirus 2 (SARS-CoV-2) has  
20 compromised the efficacy of currently available vaccines and monoclonal antibody (mAb)-based  
21 treatment options for COVID-19. The limited number of authorized small-molecule direct-acting  
22 antivirals present challenges with pill burden, the necessity for intravenous administration or  
23 potential drug interactions. There remains an unmet medical need for effective and convenient  
24 treatment options for SARS-CoV-2 infection. SARS-CoV-2 is an RNA virus that depends on  
25 host intracellular ribonucleotide pools for its replication. Dihydroorotate dehydrogenase  
26 (DHODH) is a ubiquitous host enzyme that is required for de novo pyrimidine synthesis. The  
27 inhibition of DHODH leads to a depletion of intracellular pyrimidines, thereby impacting viral  
28 replication in vitro. Brequinar (BRQ) is an orally available, selective, and potent low nanomolar  
29 inhibitor of human DHODH that has been shown to exhibit broad spectrum inhibition of RNA  
30 virus replication. However, host cell nucleotide salvage pathways can maintain intracellular  
31 pyrimidine levels and compensate for BRQ-mediated DHODH inhibition. In this report, we  
32 show that the combination of BRQ and the salvage pathway inhibitor dipyridamole (DPY)  
33 exhibits strong synergistic antiviral activity in vitro against SARS-CoV-2 by enhanced depletion  
34 of the cellular pyrimidine nucleotide pool. The combination of BRQ and DPY showed antiviral  
35 activity against the prototype SARS-CoV-2 as well as the Beta (B.1.351) and Delta (B.1.617.2)  
36 variants. These data support the continued evaluation of the combination of BRQ and DPY as a  
37 broad-spectrum, host-acting antiviral strategy to treat SARS-CoV-2 and potentially other RNA  
38 virus infections.

## 39 INTRODUCTION

40 As of March 2022, there have been more than 6-million reported deaths and greater than 400-  
41 million cases of coronavirus disease 2019 (COVID-19) worldwide as suggested by the World  
42 Health Organization (WHO; <https://covid19.who.int/>). Furthermore, the number of infections  
43 with severe acute respiratory syndrome coronavirus 2 (SARS-CoV-2), the causative agent of  
44 COVID-19, likely exceeds the number of reported cases with an estimated excess mortality of  
45 18.2 million [1]. Despite the availability of multiple prophylactic vaccines, SARS-CoV-2  
46 continues to evolve, compromising the efficacy of vaccines and monoclonal antibody (mAb)-  
47 based treatment options. Furthermore, there are only a handful of small-molecule antivirals  
48 including two RNA-dependent RNA polymerase (RdRp) inhibitors, remdesivir and  
49 molnupiravir, and one inhibitor of the SARS-CoV-2 main protease (Mpro), nirmatrelvir  
50 (nirmatrelvir also requires the pharmacologic booster ritonavir in order to achieve sufficient  
51 plasma drug levels). There remains therefore a high unmet medical need for safe, efficacious,  
52 and patient-friendly treatments for SARS-CoV-2 infection.

53 While the therapeutic small molecules described above are direct-acting antivirals (DAAs) that  
54 target virus-specific proteins, an alternative treatment strategy is to develop host-acting antivirals  
55 (HAAs) that target host pathways essential for the viral lifecycle. A host-based mechanism of  
56 action may provide unique advantages over DAAs including a greater likelihood of broad-  
57 spectrum antiviral activity against several families of RNA viruses. In addition, HAAs may  
58 possess an inherently higher barrier to the development of resistance when compared to DAAs as  
59 host-targets typically remain unchanged in contrast to the rapid emergence of viral variants  
60 containing mutations that decrease the efficacy of DAAs.

61 Dihydroorotate dehydrogenase (DHODH) is a host enzyme that is essential for *de novo*  
62 pyrimidine synthesis and has emerged as a candidate target of HAAs. Brequinar (BRQ) is an  
63 orally available, selective, and potent low nanomolar human DHODH inhibitor (DHODHI)  
64 shown to deplete intracellular uridine, cytidine, and thymidine levels *in vitro* and *in vivo* [2, 3, 4].  
65 As an antiviral approach, DHODHIs such as BRQ block the host production of cellular  
66 pyrimidine nucleotide triphosphates (NTPs) required by viruses for replication [5, 6, 7, 8]. To  
67 date, BRQ has been studied in multiple human clinical studies that have included more than 1000  
68 subjects with viral infection, hematologic malignancies, or autoimmune disorders [Clear Creek  
69 Bio data on file; 2, 3, 9, 10].

70 DHODHIs exhibit potent *in vitro* activity against several RNA viruses such as SARS-CoV-2,  
71 influenza, Zika (ZKV), Dengue (DENV), respiratory syncytial virus (RSV), and Ebola (EBOV)  
72 [5, 6, 7, 8]. Despite this promising *in vitro* data, the successful translation of DHODHI  
73 monotherapy showing clinical benefit is lacking. While the DHODHI NITD-982 exhibited *in*  
74 *vitro* antiviral activity against DENV, the *in vivo* treatment of infected mice had no effect on  
75 viremia [11]. This is likely due to other pathways that can compensate for the reduction of  
76 pyrimidine NTPs by DHODH inhibition such as the host nucleoside transporters (equilibrative  
77 nucleoside transporters, ENT) that facilitate salvage via extracellular uridine and cytidine [12,  
78 13]. The concentration of extracellular uridine in mammalian plasma may range up to 10  $\mu\text{M}$   
79 [12] and may have contributed to limited clinical efficacy of DHODH inhibition in the oncology  
80 setting [2].

81 A combination of DHODH and nucleotide salvage pathway inhibitors may therefore be required  
82 for optimal therapeutic efficacy (**Figure 1**). Consistent with this hypothesis, the antiviral activity

83 of a DHODHI against DENV was enhanced by the addition of cyclopentenyl uracil, an inhibitor  
84 of uridine salvage [14]. BRQ has also been shown to synergize with the ENT1/2/4 inhibitor  
85 dipyridamole (DPY) which blocks the transport of extracellular pyrimidines needed for *in vitro*  
86 growth of tumor cell lines [13]. DPY, FDA approved in 1961  
87 [[https://www.accessdata.fda.gov/drugsatfda\\_docs/label/2019/012836s0611bl.pdf](https://www.accessdata.fda.gov/drugsatfda_docs/label/2019/012836s0611bl.pdf)], also inhibits  
88 platelet aggregation and has widespread clinical use in combination with aspirin for the  
89 secondary prevention of stroke  
90 [[https://www.accessdata.fda.gov/drugsatfda\\_docs/label/2012/020884s0301bl.pdf](https://www.accessdata.fda.gov/drugsatfda_docs/label/2012/020884s0301bl.pdf)]. We chose to  
91 evaluate the *in vitro* pharmacologic and antiviral activity of the combination of BRQ and DPY  
92 (BRQ+DPY) in uninfected and SARS-CoV-2-infected A549/ACE2 cells.

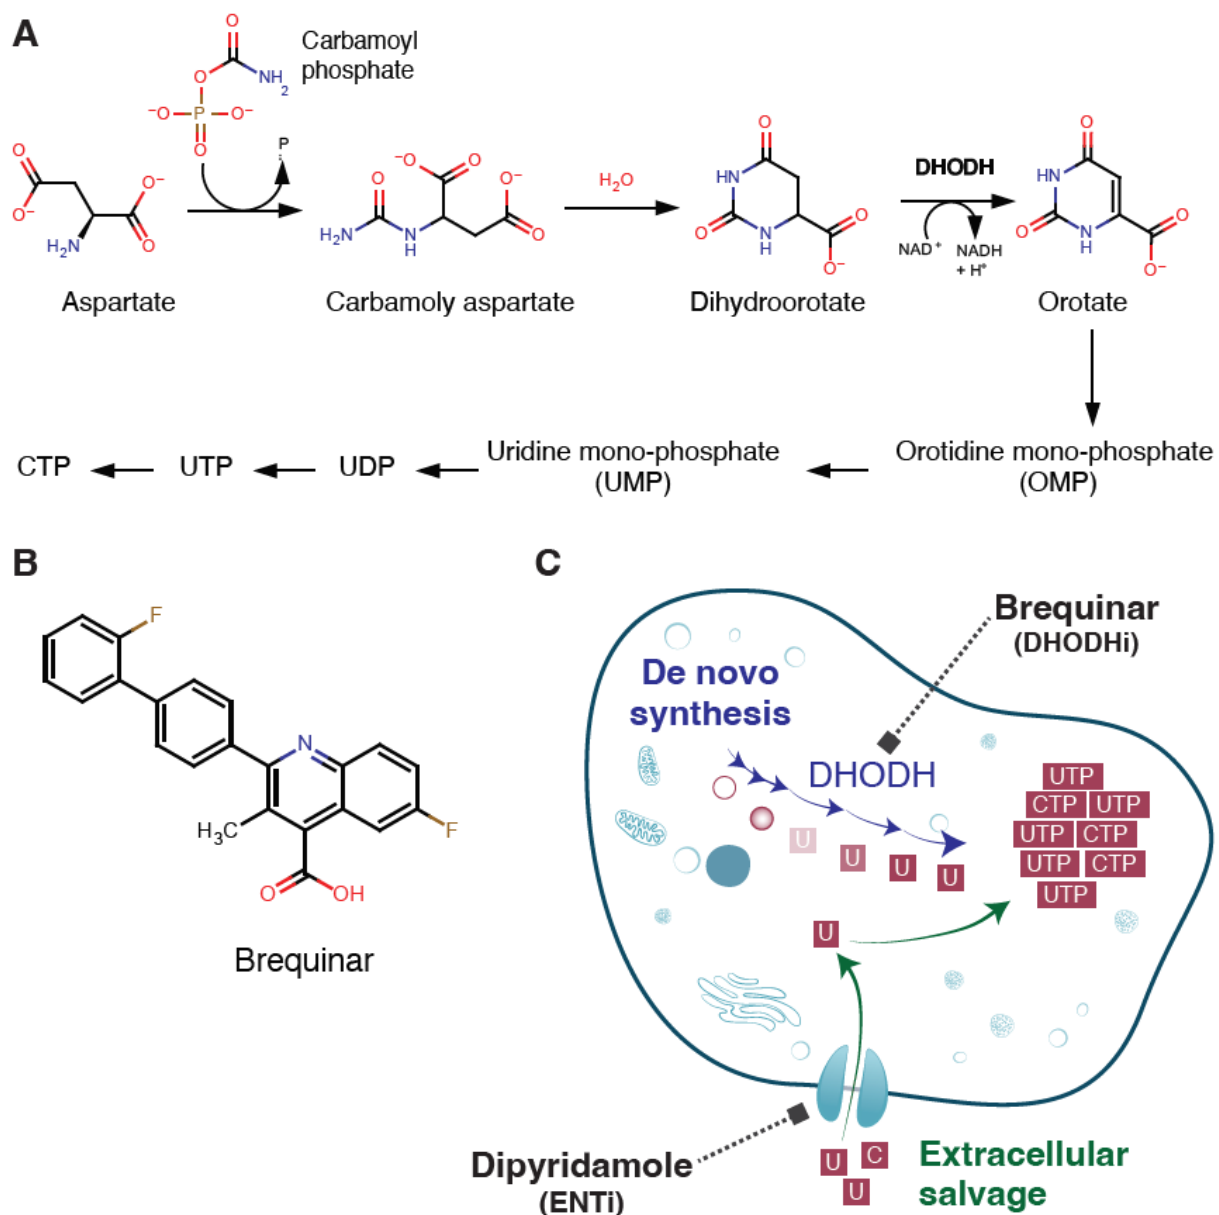

93

94 **Figure 1:** Rationale for combined DHODH and salvage pathway inhibition

## 95 RESULTS

### 96 DPY potentiates the suppression of pyrimidine NTPs by BRQ without apparent cytotoxicity

97 To study the effect of BRQ+DPY on the concentration of cellular pyrimidine nucleotides (CTP  
98 and UTP), uninfected A549/ACE2 cells were treated either with BRQ, DPY, or in combination,  
99 over an 8-hour time course. The A549/ACE2 cell line was derived from the parental lung  
100 carcinoma A549 and engineered to express human ACE2, the entry receptor for SARS-CoV-2,  
101 for use in antiviral assays. Cells were harvested after treatment at each time point (0, 1, 2, 4, and  
102 8 hours) and the NTP concentrations were compared to the control group (T=0, DMSO treated)  
103 (**Figure 2**).

104 The concentrations of purine nucleotides (ATP and GTP) were not decreased by any of the  
105 treatments. As a single agent, DPY (1  $\mu$ M) had no impact on either UTP or CTP levels relative  
106 to control at time 0 (baseline). Single agent BRQ (1  $\mu$ M) exhibited a reduction in pyrimidine  
107 NTPs (CTP and UTP) concentrations starting at 4 h (16% and 33% decrease for CTP and UTP,  
108 respectively) and the effect was more pronounced at 8 h (77.5% and 83.32% decrease for CTP  
109 and UTP, respectively) (**Figure 2**). The combination of BRQ (1  $\mu$ M) + DPY (1  $\mu$ M)  
110 demonstrated a potentiated effect compared to either agent alone. At 2 h, BRQ+DPY reduced  
111 CTP and UTP from baseline by 33.6% and 47.3%, respectively. At 4 h, BRQ+DPY reduced CTP  
112 and UTP concentrations from baseline by 71% and 79%, respectively; this was similar to what  
113 was seen with BRQ alone at 8 h. At 8h, BRQ+DPY reduced CTP and UTP concentrations from  
114 baseline by 86.6% and 91.6%, respectively. The effect of BRQ+DPY on pyrimidine NTP levels  
115 was significant relative to DMSO controls and BRQ as a single agent (Supplementary Tables).

116 We queried whether the effect of BRQ+DPY on pyrimidine NTP concentrations was driven by  
117 general cytotoxicity. The CC<sub>50</sub> values for BRQ, DPY, or BRQ+DPY (1:1 ratio) were >10  $\mu$ M  
118 even after three days of exposure. Notably, these concentrations of BRQ and DPY are 10-fold  
119 higher than those used to assay the inhibition of pyrimidine biosynthesis and nucleoside salvage,  
120 respectively.

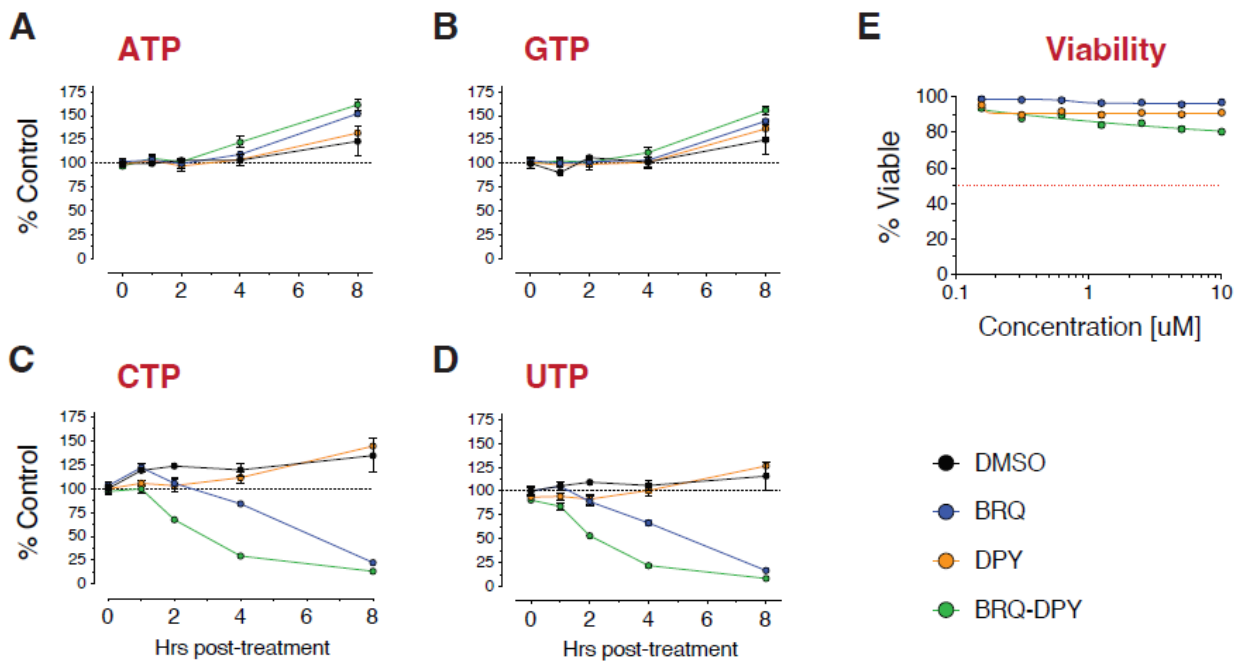

121  
122 **Figure 2. DPY potentiates the suppression of pyrimidine NTPs by BRQ without**  
123 **cytotoxicity. a-d)** Changes in cellular nucleotide pools over 8 hours in response to the treatment  
124 of brequinar (BRQ; 1  $\mu$ M) and dipyridamole (DPY; 1  $\mu$ M) for single and combination treatment.  
125 Free NTP concentrations were normalized to the vehicle control group at 0 hours post treatment  
126 (n=3 per time point, per group). e) A549/ACE2 cell viability following treatment of BRQ and  
127 DPY for three days. Cell viability was measured with CellTiter-Glo and compared to the vehicle  
128 control group (DMSO treated).



129 BRQ+DPY suppresses pyrimidine nucleotides even with high exogenous uridine

130 Given the mechanism of action as a nucleoside transport inhibitor, we asked whether DPY could  
131 potentiate the BRQ-mediated decrease in concentration of pyrimidine NTPs even in the presence  
132 of higher concentrations of exogenous uridine. To address this, we repeated the experiment in the  
133 presence or absence of uridine (20  $\mu$ M) at 4 h post compound addition in HEK-293T-hACE2  
134 (**Figure 3A**) and A549/ACE2 cells (**Figure 3B**). Pyrimidine NTP levels were substantially  
135 reduced with single agent BRQ (1 $\mu$ M) in both cell lines: HEK-293T-hACE2 (88% and 94%  
136 decrease for CTP and UTP, respectively) and A549/ACE2 (56% and 63% decrease for CTP and  
137 UTP, respectively). The combination of BRQ (1  $\mu$ M) and DPY (1  $\mu$ M) exhibited greater  
138 reduction of pyrimidine NTP levels than BRQ alone in both HEK-293T-hACE2 (87% and 96%  
139 decrease for CTP and UTP, respectively) and A549/ACE2 (91% and 94 % for CTP and UTP,  
140 respectively) cells; the latter being consistent with our previous experiment (**Figure 2**).

141 The addition of excess uridine rescued cellular CTP and UTP concentrations in cells treated only  
142 with BRQ. In contrast, and consistent with the pharmacological action of DPY, rescue of CTP  
143 and UTP levels with excess uridine was not observed in cells treated with BRQ+DPY. Purine  
144 NTP levels were not impacted by BRQ or DPY or the combination (data not shown). This result  
145 confirms that blocking pyrimidine salvage potentiates the BRQ effect on intracellular pyrimidine  
146 NTP concentrations in cells even in the presence of excess concentrations of extracellular  
147 uridine.

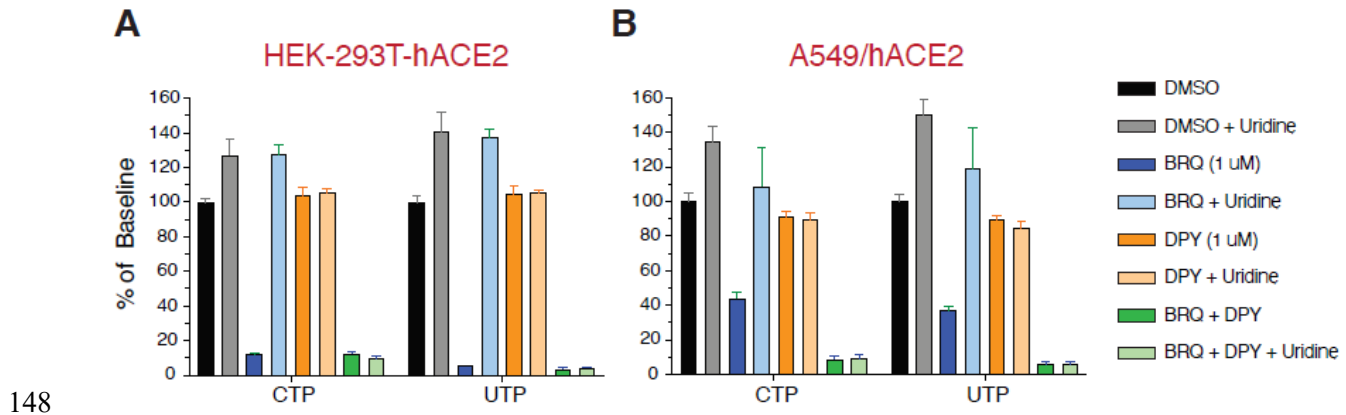

148

149 **Figure 3: BRQ+DPY suppresses levels of pyrimidine nucleotides even in presence of high**  
150 **concentrations of exogenous uridine.** The ability of 1  $\mu$ M BRQ or 1  $\mu$ M DPY alone or in  
151 combination to decrease intracellular pyrimidine nucleotides concentrations in HEK-293T-  
152 hACE2 (Panel A) and A549/ACE2 (Panel B) at 4 h post compound addition; the effect of BRQ  
153 alone was more pronounced in HEK-293T-hACE2 cells. The addition of excess exogenous  
154 uridine (20 M) was able to rescue pyrimidine nucleotides inhibition by BRQ alone but not by the  
155 combination BRQ+DPY in both HEK-293T-hACE2 and A549-ACE2 cells. Purine nucleotides  
156 levels were unaffected in either cell type (data not shown).

157 BRQ+DPY exhibits synergistic antiviral activity *in vitro* against SARS-CoV-2

158 Given their mechanisms of action and our *in vitro* data showing that the combination of  
159 BRQ+DPY rapidly lowers pyrimidine NTP pools which are required for viral RNA  
160 synthesis/replication (**Figure 2**), we explored whether BRQ+DPY may also exhibit greater  
161 antiviral activity than either agent alone.

162 *BRQ+DPY demonstrates synergistic antiviral activity*

163 The antiviral activity of BRQ+DPY inhibition was assessed in A549/ACE2 cells infected with  
164 SARS-CoV-2 Beta variant (B.1.351) (**Figure 4**). DPY treatment alone had no impact on SARS-  
165 CoV-2 infection (data not shown). The antiviral activity of BRQ was enhanced in a dose-  
166 dependent manner by the addition of DPY (**Figure 4A** and **Table 1**). The decrease in EC<sub>50</sub>  
167 values was observed across pharmacologically relevant concentrations of DPY (0.78 μM or  
168 1.563 μM; [15]); decreases from 2.67 μM for BRQ alone to 0.80 μM (3.3-fold lower) and to  
169 0.59 μM (4.5-fold lower), respectively. Similar enhancement of BRQ antiviral activity with the  
170 addition of DPY was also observed in separate experiments using Vero cells infected with  
171 geographically distinct Wuhan-related SARS-CoV-2 strains (data not shown). The antiviral  
172 activity of BRQ+DPY was not attributable to cellular cytotoxicity as cytotoxicity of BRQ and  
173 DPY alone or as a combination of BRQ (5.0 μM max) and either DPY at 0.78 μM or 12.5 μM  
174 was <50% in the MTT assay (Supplemental Figure S1).

175 To determine whether BRQ+DPY had additive, synergistic, or antagonistic interactions, the  
176 antiviral data were analyzed using a combination of Loewe and Bliss models [16]. The 2-drug  
177 combination of BRQ+DPY exhibited a strong synergistic interaction (**Figure 4B** and **Table 1**).  
178 The average synergy score from three replicates was 22.6, with the most synergistic area  
179 covering 75.2 arbitrary square units. These data confirm synergistic antiviral activity of  
180 BRQ+DPY in the treatment of SARS-CoV-2 at pharmacologically relevant drug concentrations.

#### 181 *Exogenous uridine supplementation partially abrogates the synergistic effect*

182 The effect of excess exogenous uridine on the antiviral activity of BRQ+DPY was more  
183 pronounced at DPY concentrations <3 μM where substantial or complete reversal of antiviral  
184 activity (e.g., EC<sub>50</sub> > maximum concentration tested) was observed. DPY concentrations at or

185 above 6.25  $\mu$ M decreased the impact of excess uridine (**Table 1, examples in Figure 4C**).  
 186 Consistent with the increase in EC<sub>50</sub> values for BRQ+DPY in the presence of 20  $\mu$ M uridine,  
 187 synergy analysis of infection data revealed a shift in synergistic dose combinations to higher  
 188 concentrations of both drugs (**Figure 4D**). Furthermore, the synergy score in the presence of  
 189 excess exogenous uridine was -4.7, which falls in the range of additivity. The additive score is in  
 190 part confounded by the apparent antagonism of excess uridine at low concentrations of DPY and  
 191 by the lesser effect at higher DPY concentrations. The physiological relevance of 20  $\mu$ M uridine,  
 192 some 2- to 9-fold higher than physiologic levels [12], is not clear.

193 **Table 1. BRQ+DPY Synergy vs SARS-CoV-2 Beta (B.1.351)**

| Treatment             | EC <sub>50</sub> [uM]<br>No Added Uridine | Fold-Change<br>vs<br>BRQ Alone | EC <sub>50</sub> [uM]<br>With 20uM Uridine | Fold-Change<br>vs<br>BRQ Without<br>Added Uridine |
|-----------------------|-------------------------------------------|--------------------------------|--------------------------------------------|---------------------------------------------------|
| DPY Alone             | >50                                       | N/A                            | >50                                        | N/A                                               |
| BRQ Alone             | 2.67                                      | 1.00                           | >5                                         | >1.87                                             |
| BRQ + 0.195uM DPY     | 1.06                                      | -2.51                          | >5                                         | >4.70                                             |
| BRQ + 0.390uM DPY     | 0.94                                      | -2.85                          | >5                                         | >5.34                                             |
| BRQ + 0.789uM DPY     | 0.80                                      | -3.35                          | >5                                         | >6.27                                             |
| BRQ + 1.563uM DPY     | 0.59                                      | -4.50                          | 1.09                                       | 1.84                                              |
| BRQ + 3.125uM DPY     | 0.57                                      | -4.66                          | 0.90                                       | 1.57                                              |
| BRQ + 6.250uM DPY     | 0.44                                      | -6.12                          | 0.63                                       | 1.44                                              |
| BRQ + 12.5uM DPY      | 0.32                                      | -8.24                          | 0.40                                       | 1.23                                              |
| BRQ + 25uM DPY        | 0.28                                      | -9.48                          | 0.28                                       | 1.00                                              |
| BRQ + 50uM DPY        | 0.28                                      | -9.53                          | 0.27                                       | 1.00                                              |
| <b>Synergy</b>        |                                           |                                |                                            |                                                   |
| Synergy Score (Ave)*  | 22.57                                     | Synergy                        | -4.66                                      | Additivity                                        |
| Most Synergistic Area | 75.15                                     |                                | 58.36                                      |                                                   |

194 \*Determined with ZIP (Bliss+Loewe); Synergy scores: >10.0 indicates synergy; -10 to 10  
 195 indicates additivity; < -10 indicates antagonism; N/A: Not Applicable.

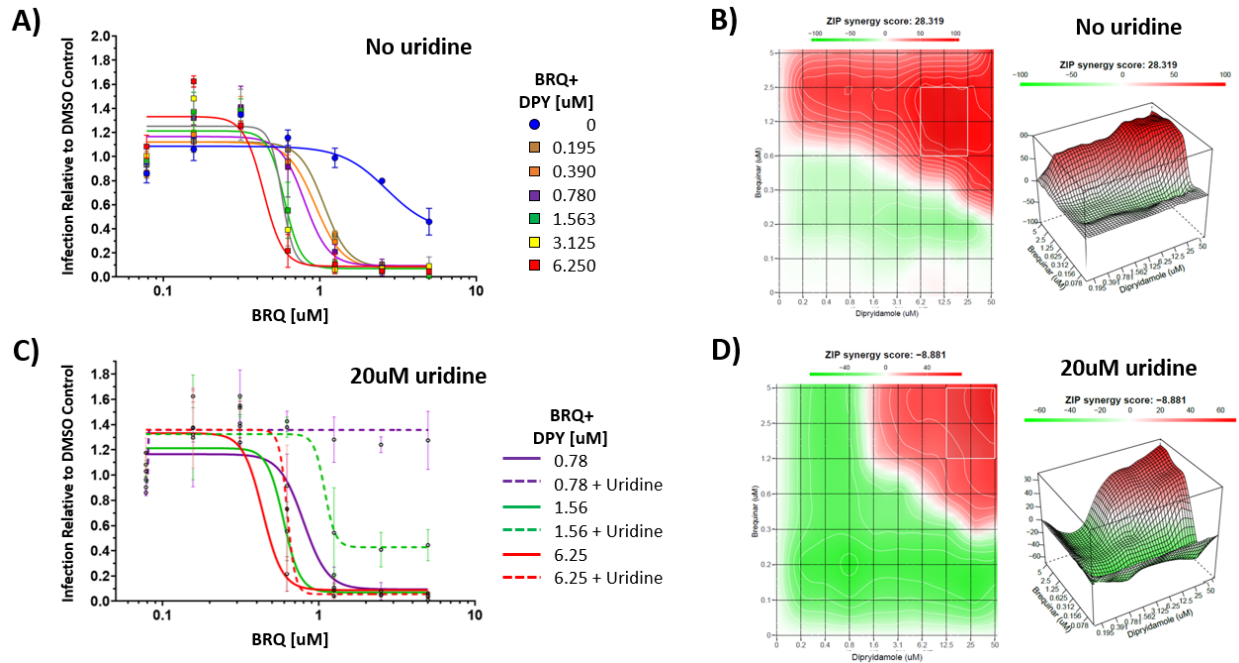

196

197

**Figure 4: BRQ+DPY exhibits strong synergistic antiviral activity that is partially**

198

**abrogated by supplementation of extracellular uridine. A) The antiviral activity of BRQ**

199

alone was enhanced in a dose-dependent manner by the addition of DPY. BRQ at concentrations

200

of 0.078 – 5.0  $\mu\text{M}$  alone or in combination with DPY at concentrations of 0.195 – 50.0  $\mu\text{M}$  were

201

evaluated. B) The 2-drug combination of BRQ+DPY exhibited strong synergy with highest

202

effect observed at BRQ 0.6 – 2.5  $\mu\text{M}$  and DPY 6.2 – 25  $\mu\text{M}$ . C) The addition of excess

203

exogenous uridine reduces the dose-dependent effect of BRQ+DPY. D) Addition of 20  $\mu\text{M}$

204

uridine shifts the area of greatest synergy towards higher concentrations of both BRQ and DPY,

205

and synergy scores suggest that uridine addition abrogates synergy still observed at higher DPY

206

concentrations, rendering the effect of the drug combination overall as additive. A549-ACE2

207

cells were dosed with BRQ combinations of drugs and challenged with SARS-CoV-2 infection for

208

48 h. Infection was quantified from IFA images stained for SARS-CoV-2 N protein, and synergy

209

was calculated using SynergyFinder2.0 [16] under the LL4 curve and ZIP models. Dark red areas

210

and peaks in the contour plot indicate strong synergistic interaction, with the white box

211 representing the area of strongest synergy. Synergy scores greater than 10 indicate a synergistic  
212 interaction, -10 to 10 suggests additivity, and less than -10 supports antagonism.

213 *BRQ antiviral activity against SARS-CoV-2 Delta Variant of Concern (B.1.617.2) is enhanced*  
214 *with low concentrations of DPY*

215 Based on the findings with SARS-CoV-2 Beta (B.1.351), the antiviral activity of BRQ+DPY  
216 was evaluated in the same assay system using the SARS-CoV-2 Delta variant of concern (VOC)  
217 (B.1.617.2) (**Figure 5**). BRQ+DPY also exhibited enhanced antiviral activity against SARS-  
218 CoV-2 Delta (B.1.617.2), relative to DMSO control as well as single agent BRQ.

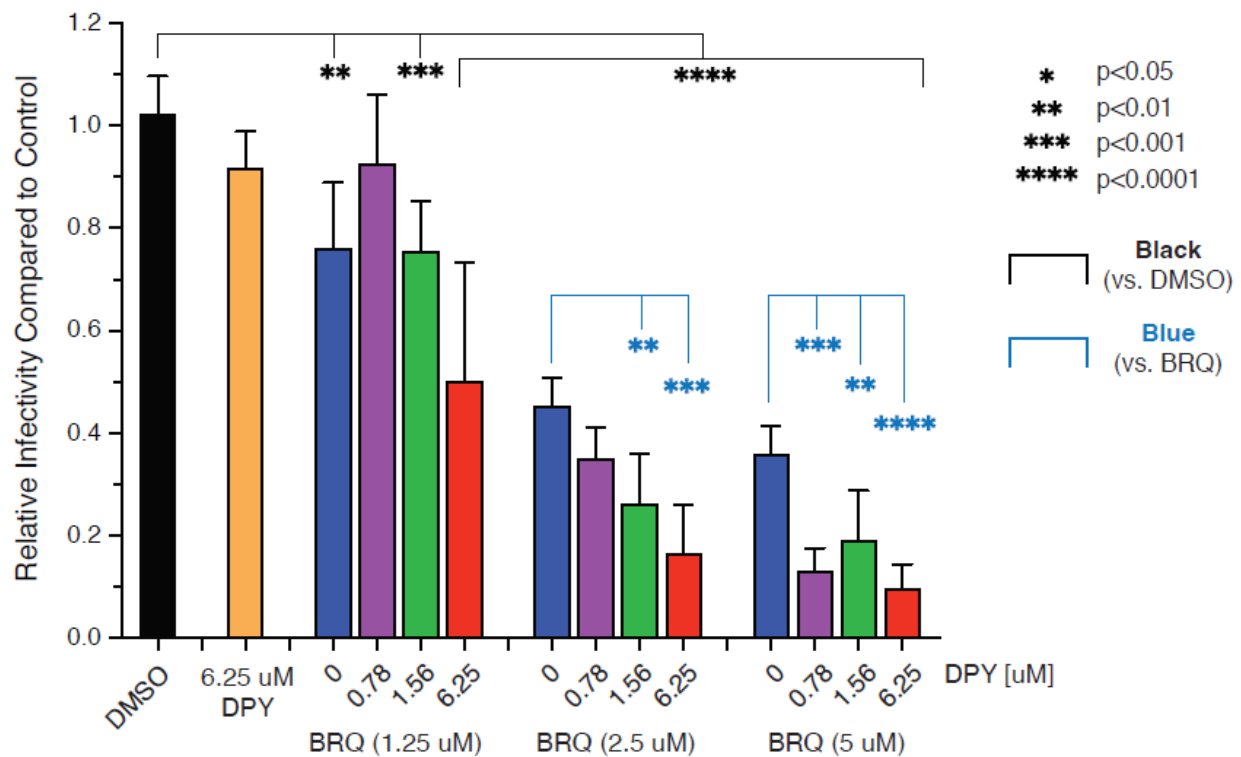

219 **Figure 5: BRQ antiviral activity against SARS-CoV-2 Delta VOC (B.1.617.2) is enhanced**  
220 **with low concentrations of DPY.** The antiviral activity of BRQ alone was enhanced in a dose-  
221 dependent manner by the addition of low concentrations of DPY. BRQ at concentrations of 1.25,  
222

223 2.5 and 5.0  $\mu\text{M}$  alone or in combination with DPY at concentrations of 0.78, 1.56 and 6.25  $\mu\text{M}$   
224 were evaluated. A549-ACE2 cells were dosed with combinations of drugs and challenged with  
225 SARS-CoV-2 infection for 48 h. Infection was quantified from IFA images stained for SARS-  
226 CoV-2 N protein.

## 227 DISCUSSION

228 There remains a significant unmet medical need for safe and convenient treatments for people  
229 infected with SARS-CoV-2. The most recently authorized antivirals have challenges with pill  
230 burden, inconvenient routes of administration, or potential drug interactions. The potential  
231 efficacy of DHODHI monotherapy for treatment of viral infection in humans remains to be  
232 proven. Clinical experience in the oncology space suggests that the impact of available  
233 extracellular uridine and the activity of nucleoside transporters may limit the efficacy of  
234 DHODHI monotherapy. The *in vitro* antiviral activity of BRQ alone against SARS-CoV-2 has  
235 been reported by others [17, 18, 19]. Given the growing evidence suggesting that DHODH  
236 inhibition alone *in vitro* may not translate to *in vivo* activity, we explored a host-target antiviral  
237 strategy with the combination BRQ and DPY.

238 The addition of DPY enhanced the inhibitory effect of BRQ on the concentration of intracellular  
239 pyrimidine NTPs *in vitro*. This effect was consistent in the HEK-293T-hACE2 and A549/ACE2  
240 cell lines (**Figs 2-3**) as well as multiple other cell lines and primary cells (data not shown). The  
241 depletion of pyrimidine NTP pools by BRQ could be overcome with the addition of excess  
242 exogenous uridine (20  $\mu\text{M}$ ) whereas the inhibitory activity of BRQ+DPY was preserved in the  
243 setting of high concentrations of extracellular uridine. Furthermore, the inhibitory activity  
244 associated with low concentrations of BRQ and DPY was not driven by apparent cytotoxicity.

245 Within a cell infected with SARS-CoV-2, more than 50% of RNA transcripts are viral RNA  
246 transcripts, and all nucleotides are host-derived [20]. Thus, potent reduction of pyrimidine NTP  
247 pools by the combination of BRQ+DPY should effectively limit viral replication. In A549/ACE2  
248 cells (**Figure 4**), DPY alone had no evidence of antiviral effect against SARS-CoV-2 Beta  
249 (B.1.351) and BRQ had marginal single agent activity consistent with published reports [17, 18,  
250 19] and Clear Creek Bio data (not shown). Consistent with the enhanced *in vitro* reduction of  
251 pyrimidine NTP levels in uninfected cells with 1  $\mu$ M BRQ (**Figure 2**), the addition of DPY  
252 increased the antiviral activity of BRQ alone in a dose-dependent manner (**Figure 4A and Table**  
253 **1**). It is worth noting that as with the *in vitro* analyses of pyrimidine NTP levels, the antiviral  
254 activity of BRQ+DPY was evident at concentrations with potential pharmacologic relevance,  
255  $<2 \mu$ M each [Clear Creek Bio data on file; 9, 15] and was not driven by apparent cytotoxicity  
256 even at high concentrations. The analysis of 2-drug antagonism or additivity/synergy using a  
257 combination of Loewe and Bliss models demonstrated strong synergy for the combination of  
258 BRQ+DPY.

259 The addition of excess exogenous uridine abrogated the antiviral activity of BRQ in combination  
260 with lower concentrations of DPY in SARS-CoV-2 infected A549/ACE2 cells though this  
261 abrogation was less pronounced at the higher DPY concentrations (**Figure 4C and Table 1**). The  
262 synergy analysis in the presence of 20  $\mu$ M uridine shifted from synergy to additivity. These data  
263 highlight the importance of extracellular uridine in maintaining cellular pyrimidine NTP levels  
264 and supports the concept that inhibiting both *de novo* and salvage pyrimidine pathways with  
265 BRQ+DPY merits further exploration.



266 A major area of concern is the development of viral resistance, as seen with selective pressures  
267 by DAAs, or viral escape from immune pressures that lead to the emergence of novel SARS-  
268 CoV-2 VOCs, as has been observed after vaccination and the development of natural immunity.  
269 As BRQ and DPY target host rather than viral proteins, the antiviral activity of BRQ+DPY  
270 should have limited liability with respect to viral escape or development of resistance. Our data  
271 demonstrated comparable antiviral activity of BRQ+DPY against SARS-CoV-2 strains including  
272 those like the original Wuhan-1 as well as Beta and Delta variants of concern.

273 Given the *in vitro* synergy against multiple SARS-CoV-2 strains in different cell types, a similar  
274 enhancement of BRQ antiviral activity may be observed *in vivo* with the host-based combination  
275 treatment of BRQ+DPY. Furthermore, given this synergy and the inability of excess exogenous  
276 uridine to reverse this, the HAA combination of BRQ + DPY may be expected to present a high  
277 barrier to the development of clinically relevant resistance relative to DAAs. This needs to be  
278 formally assessed in clinical trials.

279 In this report, we demonstrated that the combination of BRQ+DPY significantly reduces  
280 pyrimidine NTP levels which translates to synergistic antiviral activity against SARS-CoV-2  
281 variants *in vitro*. The antiviral activity observed with BRQ+DPY at pharmacologically relevant  
282 concentrations supports continued investigation of this combination as an oral treatment  
283 approach for COVID-19. A small, outpatient Phase 2 clinical trial is currently underway to  
284 evaluate this concept. [<https://clinicaltrials.gov/ct2/show/NCT05166876>]. Finally, if this  
285 approach is successful, investigation of the use of BRQ+DPY in other RNA viral infections may  
286 be warranted.

## 287 MATERIALS AND METHODS

### 288 Test Articles

289 Brequinar (Selleck Chemicals, Cat# S6626) and dipyridamole (Sigma Aldrich Prod# D9766)  
290 were provided by Clear Creek Bio. Uridine was obtained from Sigma (Cat#: U3003-5G) and  
291 Alfa Aesar/Fisher (AAA1522706) for the NTP and antiviral assays, respectively.

### 292 Cell lines and virus

293 A549/ACE2 and HEK-293T-hACE2 (BEI resources, NR-53821 and NR-52511) cells were  
294 cultured in DMEM media supplemented with 10% FBS and 2 mM L-glutamine. Cells were  
295 passed twice in a week and maintained at 37° C with 5 % CO<sub>2</sub>. The absence of mycoplasma  
296 contamination was validated regularly with a PCR-based method (ATCC, Universal  
297 Mycoplasma Detection Kit, 30-1012K).

### 298 *In vitro* determination of BRQ+DPY effect on pyrimidine NTPs

299 Cells were plated in 6-well plates (200,000 cells/well) one day prior to experiment. Test  
300 compounds were dissolved in DMSO as a stock and then diluted in culture media before testing.  
301 The final concentration of DMSO was kept at 0.25%. For drug treatment, cell supernatant was  
302 removed and replaced with media containing test compounds (n=3 per group). At timepoints  
303 denoted, cell lysates were prepared according to a protocol published [21] with minor  
304 modifications. In brief, cells were washed with PBS and treated with 0.75 mL of with 0.4 N  
305 perchloric acid (PCA) on ice and harvested. Extracts were centrifuged (1500 rpm) and  
306 supernatants were combined with a second 0.25 ml extraction. Extracts were combined and

307 neutralized with 10 N and 1 N KOH. Neutralization was determined using pH paper. Samples  
308 were stored at -20°C until. The NTP concentrations of samples were analyzed with HPLC.

309 PCA extracts were analyzed using either a Waters 2695e HPLC with a Waters 2489 UV/Visible  
310 detector or a Waters 2695 HPLC with a Waters 2487 Dual  $\lambda$  Absorbance detector. A Partisil 10  
311 SAX column separated nucleoside triphosphates at a flow rate of 1.5 ml/min with a 50-minute  
312 concave gradient curve (curve 8) from 60% 0.005 M NH<sub>4</sub>H<sub>2</sub>PO<sub>4</sub> (pH 2.8) and 40% 0.75 M  
313 NH<sub>4</sub>H<sub>2</sub>PO<sub>4</sub> (pH 3.8) to 100% 0.75 M NH<sub>4</sub>H<sub>2</sub>PO<sub>4</sub> (pH 3.8). Standard ribonucleotides were used  
314 to create a standard curve, which was used to quantitate nucleotide pools [21].

315 Analysis of Variance with Dunnett's Multiple Comparisons Test was used to test for significant  
316 differences from the DMSO Control at Time 0 vs all other conditions or DMSO vs BRQ, DPY,  
317 or BRQ+DPY treatment at each timepoint (Supplemental Tables S1 and S2).

318 For assessment of potential cytotoxicity, cells were seeded in 96-well white plates at a density of  
319 12,000 cells per well and cultured overnight. The next day, test compound diluted in cell culture  
320 media were added to the cells at the final concentration from 50  $\mu$ M to 0.4  $\mu$ M, 8 points by 2-  
321 fold serial dilution. After three days of incubation, cell viability was evaluated with CellTiter-  
322 Glo, measuring luminescence with Synergy 4 (Biotek). 1% of Triton-X100 and 0.25% DMSO  
323 were used as the positive and negative control, 0 and 100% cell viability, respectively.

#### 324 BRQ+DPY antiviral experiments

325 A549/ACE2 cells were plated in 96-well plates at a density of 10,000 cells per well in RPMI  
326 supplemented with 10% FBS and allowed to adhere overnight. The following day cells were  
327 treated with 2-fold dilution series in triplicate of brequinar (ranging 5  $\mu$ M – 0.0781  $\mu$ M) and

328 dipyrnidamole (ranging 50  $\mu\text{M}$  – 0.195  $\mu\text{M}$ ) in a matrix format allowing each concentration pair  
329 to be tested. Dilution series of each compound alone were included on each plate, as well as  
330 10  $\mu\text{M}$  remdesivir positive control and DMSO negative control wells. Exogenous uridine  
331 (20  $\mu\text{M}$ ) was added to an additional three plates to test whether brequinar inhibition of DHODH-  
332 catalyzed uridine synthesis can be overcome by addition of excess uridine. Following one hour  
333 of incubation with compounds, cells were challenged with approximately 400 FFU of SARS-  
334 CoV-2 Beta (B.1.351; hCoV-19/USA/MD-HP01542/2021) and incubated at 37 °C for 48 h. In a  
335 separate experiment using A549/ACE2 cells, dilution series of brequinar and dipyrnidamole alone  
336 or brequinar + 0.78  $\mu\text{M}$  or 12.5  $\mu\text{M}$  dipyrnidamole were tested with the SARS-CoV-2 Delta VOC  
337 (B.1.617.2). Pre-treatment time, infection dose, and length of infection were the same as with  
338 Beta variant. Analysis of Variance with Dunnett's Multiple Comparisons Test was used to test  
339 for significant differences from the DMSO Control vs BRQ or BRQ+DPY treatment or between  
340 BRQ alone vs BRQ+DPY.

#### 341 Immunofluorescence detection of SARS-CoV-2 infection efficiency

342 Following 48 h of infection plates were fixed in 10% formalin for at least 6 h before removal  
343 from the high containment laboratory. Plates were washed in PBS, permeabilized in 0.1% Triton  
344 X-100 for 15 min at room temperature and blocked in 3.5% BSA for at least 1 h at room  
345 temperature. To detect infection, plates were incubated overnight at 4 °C with a rabbit anti-N  
346 protein monoclonal antibody (SioBiological 40143-R004) diluted 1:20,000. Plates were washed  
347 and treated with an AF488-conjugated goat anti-rabbit secondary antibody for 2 h at room  
348 temperature. Finally, Hoechst33342 was added to visualize cell nuclei. Plates were imaged on a  
349 Cytation 1 Multimode Plate Reader (BioTek) using a 4X objective lens. Infection efficiency,

350 defined as GFP-positive cells divided by total nuclei, was calculated for each image using a  
351 CellProfiler pipeline.

### 352 Synergy calculations

353 Drug synergy was calculated with SynergyFinder2.0 [16] using inhibition readout, LL4 curve  
354 fitting, and ZIP model parameters.

### 355 ACKNOWLEDGEMENTS

356 We thank Cindy Motaka for assistance in editing, Dr Olga Kharchenko for assistance with  
357 Figure 1, Dr Justin Patten (Davey Lab) for help with antiviral assay development and Dr. David  
358 Hesson for assistance in experimental design. J.F.D, M.K, J.C.P. Jr, N.S., D.B.S., and V.S.K.  
359 hold equity in Clear Creek Bio. M.K. and V.S.K are employees of Clear Creek Bio. V.G., D.C.,  
360 J.F.D, N.S, J.C.P. Jr, and D.B.S. are paid consultants of Clear Creek Bio. D.B.S. holds equity in  
361 SAFI Biosolutions. Clear Creek Bio funded all work described in this article, including  
362 Sponsored Research Agreements with Boston University, MD Anderson Cancer Center and the  
363 University of Louisville.

364 REFERENCES

- 365 1. COVID-19 Excess Mortality Collaborators. 2022. Articles Estimating excess mortality due to  
366 the COVID-19 pandemic: a systematic analysis of COVID-19-related mortality, 2020–21.  
367 The Lancet [https://doi.org/https://doi.org/10.1016/S0140-6736\(21\)02796-3](https://doi.org/10.1016/S0140-6736(21)02796-3).
- 368 2. Peters GJ, Schwartzmann G, Nadal JC, Laurensse EJ, Groeningen CJ van, Vijgh WJ van der,  
369 Pinedo HM. 1990. In vivo inhibition of the pyrimidine de novo enzyme dihydroorotic acid  
370 dehydrogenase by brequinar sodium (DUP-785; NSC 368390) in mice and patients. *Cancer*  
371 *Res* 50:4644–9.
- 372 3. Peters G, Kraal I, Pinedo H. 1992. In vitro and in vivo studies on the combination of  
373 Brequinar sodium (DUP-785; NSC 368390) with 5-fluorouracil; effects of uridine. *Brit J*  
374 *Cancer* 65:229–233.
- 375 4. Sykes DB, Kfoury YS, Mercier FE, Wawer MJ, Law JM, Haynes MK, Lewis TA,  
376 Schajnovitz A, Jain E, Lee D, Meyer H, Pierce KA, Tolliday NJ, Waller A, Ferrara SJ,  
377 Eheim AL, Stoeckigt D, Maxcy KL, Cobert JM, Bachand J, Szekely BA, Mukherjee S, Sklar  
378 LA, Kotz JD, Clish CB, Sadreyev RI, Clemons PA, Janzer A, Schreiber SL, Scadden DT.  
379 2016. Inhibition of Dihydroorotate Dehydrogenase Overcomes Differentiation Blockade in  
380 Acute Myeloid Leukemia. *Cell* 167:171-186.e15.
- 381 5. Qing M, Zou G, Wang Q-Y, Xu HY, Dong H, Yuan Z, Shi P-Y. 2010. Characterization of  
382 Dengue Virus Resistance to Brequinar in Cell Culture. *Antimicrob Agents Ch* 54:3686–3695.
- 383 6. Adcock RS, Chu Y-K, Golden JE, Chung D-H. 2017. Evaluation of anti-Zika virus activities  
384 of broad-spectrum antivirals and NIH clinical collection compounds using a cell-based, high-  
385 throughput screen assay. *Antivir Res* 138:47–56.

- 386 7. Bonavia A, Franti M, Keaney EP, Kuhen K, Seepersaud M, Radetich B, Shao J, Honda A,  
387 Dewhurst J, Balabanis K, Monroe J, Wolff K, Osborne C, Lanieri L, Hoffmaster K, Amin J,  
388 Markovits J, Broome M, Skuba E, Cornella-Taracido I, Joberty G, Bouwmeester T, Hamann  
389 L, Tallarico JA, Tommasi R, Compton T, Bushell SM. 2011. Identification of broad-  
390 spectrum antiviral compounds and assessment of the druggability of their target for efficacy  
391 against respiratory syncytial virus (RSV). *Proc National Acad Sci* 108:6739–6744.
- 392 8. Park J-G, Ávila-Pérez G, Nogales A, Blanco-Lobo P, Torre JC de la, Martínez-Sobrido L.  
393 2020. Identification and Characterization of Novel Compounds with Broad-Spectrum  
394 Antiviral Activity against Influenza A and B Viruses. *J Virol* 94.
- 395 9. Joshi AS, King SP, Zajac BA, Makowka L, Sher LS, Kahan BD, Menkis AH, Stiller CR,  
396 Schaeffle B, Kornhauser DM. 1997. Phase I Safety and Pharmacokinetic Studies of Brequinar  
397 Sodium after Single Ascending Oral Doses in Stable Renal, Hepatic, and Cardiac Allograft  
398 Recipients. *J Clin Pharmacol* 37:1121–1128.
- 399 10. Madak JT, Bankhead A, Cuthbertson CR, Showalter HD, Neamati N. 2019. Revisiting the  
400 role of dihydroorotate dehydrogenase as a therapeutic target for cancer. *Pharmacol Therapeut*  
401 195:111–131.
- 402 11. Wang Q-Y, Bushell S, Qing M, Xu HY, Bonavia A, Nunes S, Zhou J, Poh MK, Sessions PF  
403 de, Niyomrattanakit P, Dong H, Hoffmaster K, Goh A, Nilar S, Schul W, Jones S, Kramer L,  
404 Compton T, Shi P-Y. 2011. Inhibition of Dengue Virus through Suppression of Host  
405 Pyrimidine Biosynthesis. *J Virol* 85:6548–6556.
- 406 12. Karle JM, Anderson LW, Dietrick DD, Cysyk RL. 1980. Determination of serum and plasma  
407 uridine levels in mice, rats, and humans by high-pressure liquid chromatography. *Anal*  
408 *Biochem* 109:41–46.

- 409 13. Cuthbertson CR, Guo H, Kyani A, Madak JT, Arabzada Z, Neamati N. 2020. The  
410 Dihydroorotate Dehydrogenase Inhibitor Brequinar Is Synergistic with ENT1/2 Inhibitors.  
411 *Acs Pharmacol Transl Sci* 3:1242–1252.
- 412 14. Liu Q, Gupta A, Okesli-Armlovich A, Qiao W, Fischer CR, Smith M, Carette JE, Bassik  
413 MC, Khosla C. 2020. Enhancing the Antiviral Efficacy of RNA-Dependent RNA Polymerase  
414 Inhibition by Combination with Modulators of Pyrimidine Metabolism. *Cell Chem Biol*  
415 27:668-677.e9.
- 416 15. Gregov D, Jenkins A, Duncan E, Siebert D, Rodgers S, Duncan B, Bochner F, Lloyd J. 1987.  
417 Dipyridamole: pharmacokinetics and effects on aspects of platelet function in man. *Brit J*  
418 *Clin Pharmacol* 24:425–434.
- 419 16. Ianevski A, Giri AK, Aittokallio T. 2020. SynergyFinder 2.0: visual analytics of multi-drug  
420 combination synergies. *Nucleic Acids Res* 48:W488–W493.
- 421 17. Xiong R, Zhang L, Li S, Sun Y, Ding M, Wang Y, Zhao Y, Wu Y, Shang W, Jiang X, Shan  
422 J, Shen Z, Tong Y, Xu L, Chen Y, Liu Y, Zou G, Lavillete D, Zhao Z, Wang R, Zhu L, Xiao  
423 G, Lan K, Li H, Xu K. 2020. Novel and potent inhibitors targeting DHODH are broad-  
424 spectrum antivirals against RNA viruses including newly-emerged coronavirus SARS-CoV-  
425 2. *Protein Cell* 11:723–739.
- 426 18. Schultz DC, Johnson RM, Ayyanathan K, Miller J, Whig K, Kamalia B, Dittmar M, Weston  
427 S, Hammond HL, Dillen C, Ardanuy J, Taylor L, Lee JS, Li M, Lee E, Shoffler C, Petucci C,  
428 Constant S, Ferrer M, Thaiss CA, Frieman MB, Cherry S. 2022. Pyrimidine inhibitors  
429 synergize with nucleoside analogues to block SARS-CoV-2. *Nature* 1–9.
- 430 19. Calistri A, Luganini A, Moggetti B, Elder E, Sibille G, Conciatori V, Vecchio CD, Sainas S,  
431 Boschi D, Montserrat N, Mirazimi A, Lolli ML, Gribaudo G, Parolin C. 2021. The New



- 432        Generation hDHODH Inhibitor MEDS433 Hinders the In Vitro Replication of SARS-CoV-2  
433        and Other Human Coronaviruses. *Microorg* 9:1731.
- 434 20. Kim Y-J, Cubitt B, Cai Y, Kuhn JH, Vitt D, Kohlhof H, Torre JC de la. 2020. Novel  
435        Dihydroorotate Dehydrogenase Inhibitors with Potent Interferon-Independent Antiviral  
436        Activity against Mammarenaviruses In Vitro. *Viruses* 12:821.
- 437 21. Rodriguez CO, Plunkett W, Paff MT, Du M, Nowak B, Ramakrishna P, Keating MJ, Gandhi  
438        V. 2000. High-performance liquid chromatography method for the determination and  
439        quantitation of arabinosylguanine triphosphate and fludarabine triphosphate in human cells. *J*  
440        *Chromatogr B Biomed Sci Appl* 745:421–430.
